1 **Damage dynamics in single *E. coli* and the role of chance in the timing of**  
2 **cell death**

3

4 Yifan Yang<sup>1,2\*</sup>, Omer Karin<sup>1</sup>, Avi Mayo<sup>1</sup>, Xiaohu Song<sup>2</sup>, Peipei Chen<sup>2</sup>, Ariel B. Lindner<sup>2</sup>, Uri  
5 Alon<sup>1\*</sup>

6

7 1 Dept. molecular Cell biology, Weizmann Institute, 71600 Rehovot, Israel

8 2 Université de Paris - INSERM Unit 1284, Center for Research and Interdisciplinarity (CRI),  
9 Paris F-75004, France.

10 Corresponding \*

11

12

13 **Genetically identical cells in the same stressful condition die at different times. The origin**  
14 **of this stochasticity is unclear; it may arise from different initial conditions that affect the**  
15 **time of demise, or from a stochastic damage accumulation mechanism that erases the initial**  
16 **conditions and instead amplifies noise to generate different lifespans. To address this**  
17 **requires measuring damage dynamics in individual cells over the lifespan, but this has**  
18 **rarely been achieved. Here, we used a microfluidic device to measure membrane damage in**  
19 **648 carbon-starved *E. coli* cells at high temporal resolution. We find that initial conditions**  
20 **of damage, size or cell-cycle phase do not explain most of the lifespan variation. Instead, the**  
21 **data points to a stochastic mechanism in which noise is amplified by a rising production of**  
22 **damage that saturates its own removal. Surprisingly, the relative variation in damage**  
23 **drops with age: cells become more similar to each other in terms of relative damage,**  
24 **indicating increasing determinism with age. Thus, chance erases initial conditions and then**  
25 **gives way to increasingly deterministic dynamics that dominate the lifespan distribution.**

26

## 27 **Introduction**

28 Genetically identical organisms placed in the same conditions die at different times <sup>1-5</sup>. This non-  
29 genetic variation is shared also by single celled organisms, such as starving *E. coli* <sup>4</sup> and aging  
30 yeast <sup>6</sup>.

31 Two possibilities have been raised to understand this stochasticity of death times <sup>1,2,7,8</sup>. The first  
32 is that the initial states of individuals are different and affect the eventual time of demise <sup>2,8</sup>. The  
33 second is that initial conditions are rapidly erased by stochastic accumulation of damage over  
34 time, and stochasticity further accumulates to cause the different lifespans <sup>7</sup>. The nature of this  
35 stochastic accumulation is unclear.

36 To understand the role of chance and initial conditions in the timing of cell death, it is essential  
37 to measure the damage that causes death over time in individual cells. This, however, has rarely  
38 been done.

39 Here we use carbon-starved *E. coli* in microfluidic chambers to study the role of stochasticity  
40 and initial conditions in the time of cell death. The cells have a risk of death that rises  
41 exponentially with age <sup>4</sup>, known as the Gompertz law, which also characterizes mortality in other  
42 microorganisms and animals <sup>9</sup>. We use the well-established bacterial viability marker propidium  
43 iodide <sup>10</sup> to measure membrane damage in individual cells in the microfluidic device. We find  
44 that initial conditions of damage or cell-cycle phase do not strongly correlate with time of death.  
45 Instead, the data suggests a specific mechanistic model for the stochastic dynamics of the  
46 damage that causes death. In this model, damage-producing units such as unfolded protein  
47 complexes rise at a constant rate and produce damage, whose removal processes saturate at high  
48 damage levels. This saturation amplifies noise and leads to widely different individual dynamics,  
49 explaining the majority of variation in lifespan. Surprisingly, the relative damage variation  
50 between cells drops with age, indicating that stochasticity erases initial conditions, but then  
51 becomes less dominant and damage dynamics becomes increasingly deterministic with age.

52

## 53 **Results**

54

## 55 ***E. coli* damage dynamics in individual cells**

56

57 We tracked individually starved *E. coli* cells by time-lapse microscopy using a microfluidic  
58 system called the mother machine<sup>11</sup> (Fig. 1A). Individual cells from the same clone were loaded  
59 onto an array of dead-end micro-channels (6 $\mu$ m long and 1.1 $\mu$ m high and wide) that open onto a  
60 main channel<sup>12</sup>. The micro-channels exposed the individual cells to a homogenous medium  
61 refreshed by flow in the main channel in which the cells were starved for carbon.

62 The device prevented cells from interacting. This bypasses the effects of feeding on the remains  
63 of perished cells that occur in batch culture starvation and lead to an exponential survival curve  
64 with a constant risk of death<sup>13</sup> rather than the Gompertz law observed in the microfluidic device<sup>4</sup>.  
65 To allow different initial cell-cycle phases and cell sizes, we loaded the cells onto the chip from a  
66 culture in exponential growth. Thus, some cells have recently divided whereas others are about  
67 to divide. The chip was then thoroughly washed to eliminate traces of carbon nutrient<sup>4</sup>.

68 To follow the physiological deterioration process of each cell, we focused on membrane integrity  
69 as an indicator of damage. Membrane integrity is critical to a cell's survival<sup>14-16</sup> and is affected  
70 by many physiological parameters, including pH, redox balance, energy metabolism and  
71 translation fidelity<sup>17</sup>.

72 We measured membrane integrity with propidium iodide (PI), a well-established non-toxic dye  
73 for bacterial viability<sup>4</sup>. PI becomes fluorescent only when it penetrates the cell membrane and  
74 binds to DNA. Due to its relatively large size and charge, PI can not cross the membrane when  
75 the membrane is functionally intact. We therefore used the rate of PI uptake to quantify the  
76 integrity of bacterial membranes (Fig. 1B). PI uptake rate was calculated from the image time-  
77 series of each bacterium at resolution of 1 hour (Methods). Experimental noise of the  
78 fluorescence image time-series is estimated at about 6% (SI Fig. S1).

79 According to the Arrhenius equation, PI uptake rate is inversely proportional to the exponential  
80 of the potential barrier that the PI molecule has to cross to enter the cell. We therefore define  
81 membrane damage  $X(t)$  as the log of the PI uptake rate normalized to the mean uptake rate of the  
82 initial population (Methods). Cell death was determined by damage levels exceeding a threshold,  
83  $X_c$ . The value of  $X_c$  is determined by the maximal  $X(t)$  observed before cells reach previously  
84 established lifespans<sup>4</sup>.

85 Cells survived for an average of 82h, and showed an exponentially rising risk of death (Fig. 1C),  
86 namely the Gompertz law <sup>4</sup>. Cells rarely die in the first 40 hours, and then begin to die more and  
87 more frequently, leading to a sigmoidal survival curve well described by a Weibull function  
88 (Methods). The relative variation of death times was 24%, where 5% of the cells died by 42h,  
89 and 95% died by 106h.

90 From the time-series of PI fluorescence we measured the damage  $X(t)$  in 648 individual bacterial  
91 cells at 8 time points, which correspond to 8 non-overlapping windows of 7 hours each between  
92 20h and 80h. We do not consider the initial 20h period since it is a time over which cells adapt to  
93 the starvation conditions in the device, nor the data after 80 hours since most cells are dead.

94

95



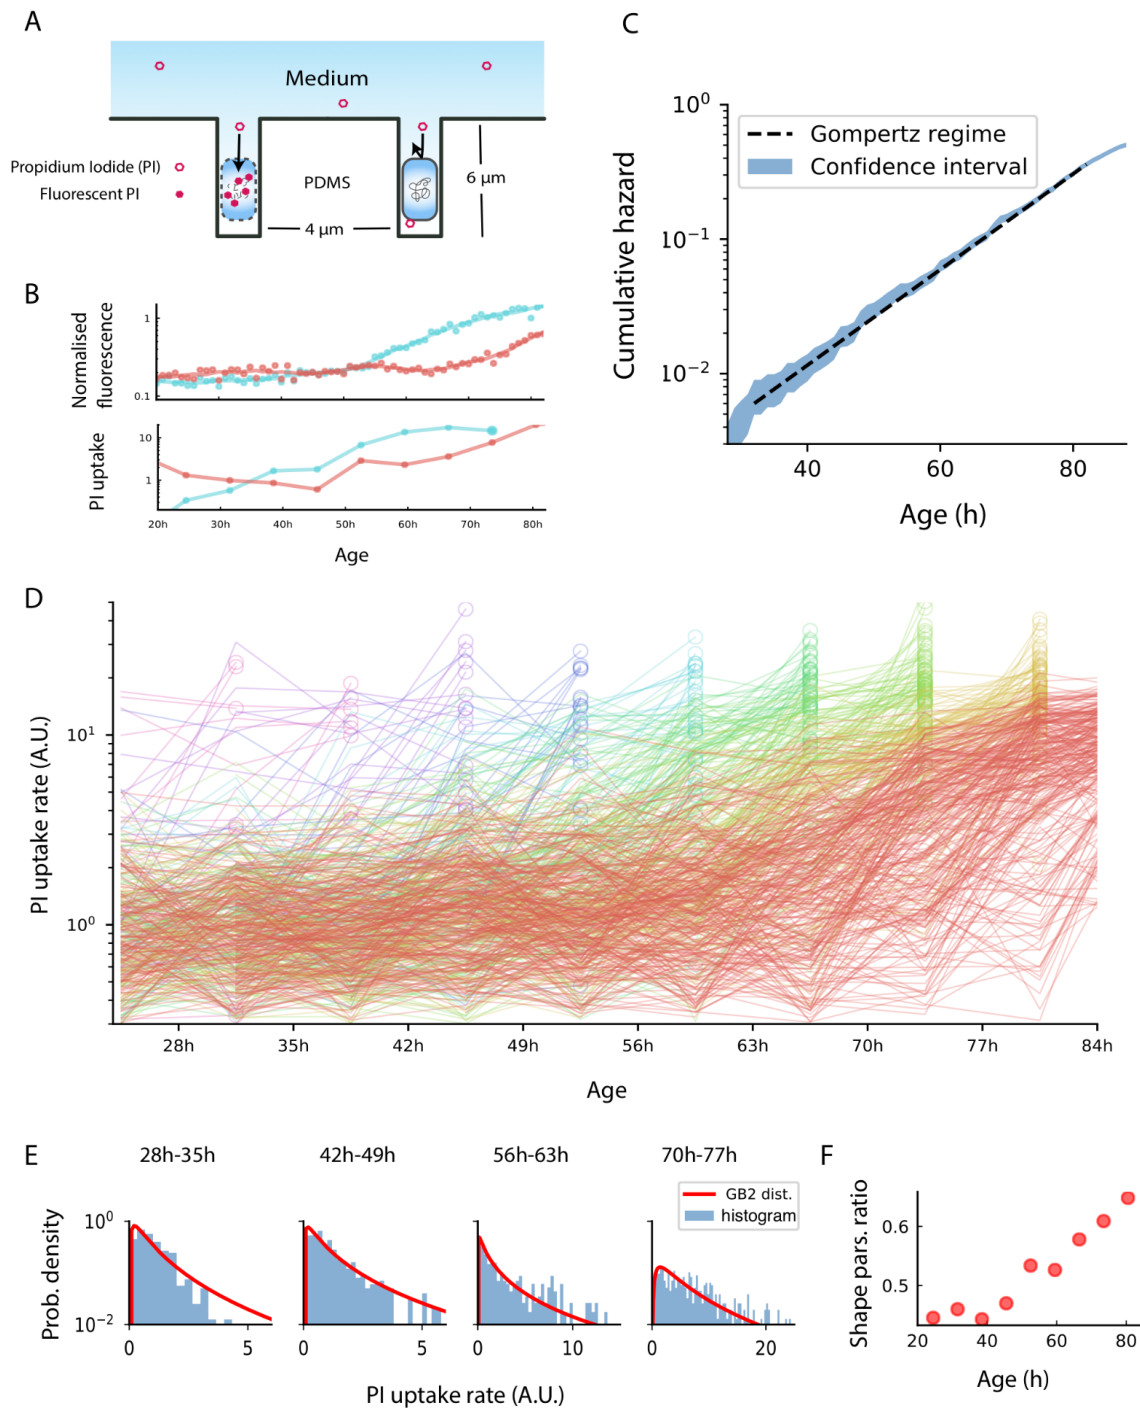

96

97 **Fig. 1. Damage dynamics in starving *E. coli* cells.** (A) Individual *E. coli* cells were placed in  
98 microfluidic channels with medium flow. Propidium iodide (PI) was added to the medium as a proxy for  
99 membrane damage. PI only crosses the membrane and stains DNA when membrane integrity is  
100 compromised. (B) Membrane damage was measured by a temporal derivative of PI fluorescence, as

101 shown for two individual bacteria. Top: fluorescence signal, bottom: derivative (uptake rate) in 7h time  
102 windows. (C) Cumulative risk of death as a function of age shows an exponential regime. Cumulative  
103 risk of death is defined as negative natural logarithm of survivorship and is equal to the integral of the  
104 hazard function. The blue region corresponds to 95% confidence intervals. Death conditions are as  
105 previously defined<sup>4</sup>. (D) Cellular damage fluctuates around a rising trajectory, subsampled to 7h time  
106 windows. Trajectories are color coded by the time window of cell death, circles indicate the last time  
107 window before death to highlight the rise in damage leading to the point of death. (E) PI uptake rate  
108 distributions and best-fit to a type-2 generalized beta distribution with the ratio between shape parameters  
109  $p/(p+q)$ , plotted versus age in (F), see Methods.  
110

111 **Initial damage and cell-cycle phase do not correlate with lifespan in most cells**

112

113 We asked whether initial conditions, namely the cell state when loaded onto the chip, might  
114 explain the variations in lifespan (Fig 2A). There was a negative correlation between initial  
115 damage and lifespan (Spearman  $r=-0.41$ ,  $p<0.001$ ). This correlation was primarily due to a subset  
116 of 3% of the cells that had high initial damage (PI uptake rate  $>4/h$ , compared to the mean uptake  
117 rate of  $0.87/h$  in the remaining cells). These initially damaged cells had a short lifespan,  
118 averaging 48h.

119 We therefore divided the cells into two populations, with initial uptake rate above and below 4  
120 (Fig. 2 B-C), which we call the high damage and low damage groups. The high damage group  
121 showed a strong correlation between initial damage and lifespan (Spearman  $r=-0.70$ ,  $n=17$ ,  
122  $p=0.002$ ). The low damage group, which comprised 95% of the cells, showed low correlation  
123 (Spearman  $r=-0.15$ ,  $n=503$ ,  $p=0.001$ ).

124 We also investigated the effect of cell-cycle phases by noting the initial size of the cell and  
125 number and timing of reductive divisions on the chip<sup>18</sup>. We find that cell size has only weak  
126 correlations with lifespan (Spearman  $r=-0.09$ ) (Fig. 2D), as did the time of last division  
127 (Spearman  $r=-0.11$ ) (Fig. 2E) and number of divisions (Spearman  $r=-0.06$ ).

128 Multiple regression shows that initial conditions explain a total of 27% of the variation for all  
129 cells, and 10% of the variation for the majority -- 95% of the cells -- with low initial damage  
130 (Fig. 2F). We conclude that in the traits measurable in this experiment, the initial conditions  
131 explain only a minority of the variation in lifespan.

132

133

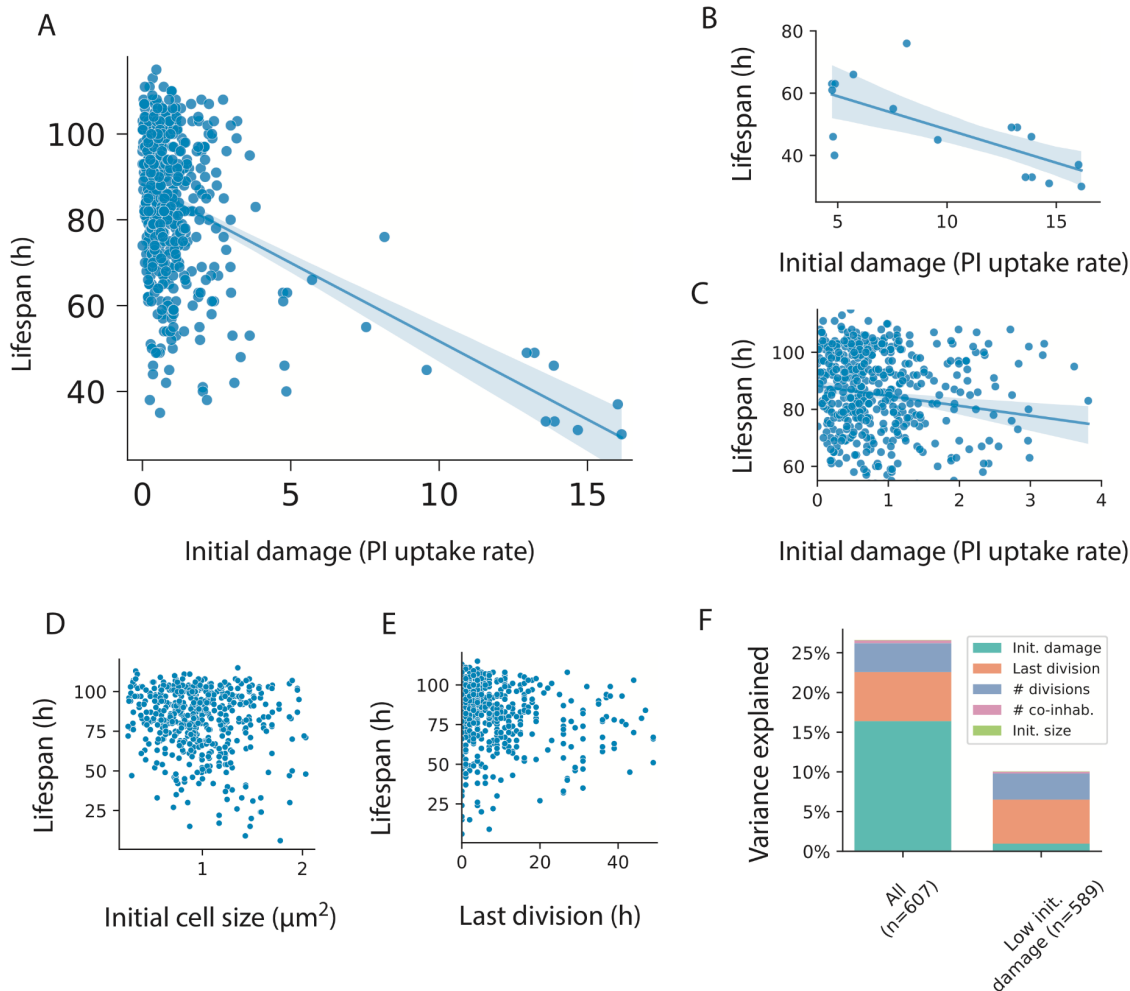

134

135 **Fig. 2. Initial conditions do not account for most of the variations in lifespan.** (A) Initial damage  
136 levels (PI uptake rate) and lifespan of all cells in the experiment; (B) For cells with high initial damage  
137 (PI uptake rate > 4, n = 18), initial damage correlates with lifespan; (C) For cells with low initial damage  
138 (< 4, n = 589), the correlation between initial damage and lifespan is weak; (D) Initial cell size and lifespan  
139 of all cells in the experiment; (E) Time of last division and lifespan for all cells in the experiment; (F)  
140 Fraction of lifespan variation explained by initial conditions according to multiple regression. Left are all  
141 cells, right are cells with low (< 4) initial damage.

142

143 **Damage dynamics rise and fall suggesting a stochastic mechanism**

144

145 We next sought to characterize the stochastic dynamics of damage, defined as PI uptake rate,  
146 over time. Damage in each cell did not accumulate monotonically. Instead, damage rose and fell  
147 in each cell, with fluctuations larger than can be explained by experimental noise (Fig. 1D). This  
148 indicates that damage is produced and removed on the timescale of hours. These fluctuations  
149 occurred around a mean trajectory that accelerated with age on the scale of tens of hours. This  
150 suggests two timescales: in addition to the fast timescales of hours, a slower timescale of tens of  
151 hours over which damage production and removal rates change.

152 Notably, we find that cells become more similar in relative terms as they age. Although the mean  
153 damage and its standard deviation both rise with age (Fig. 3 A,B,F), the standard deviation rises  
154 more slowly than the mean. As a result, the relative variation drops with age, as measured by the  
155 coefficient of variation  $CV=SD/mean$  (Fig. 3C).  $1/CV$  rose approximately linearly with age  
156 above 50h.

157 The increasing relative similarity between cells with age is seen also in the damage distributions  
158 at each timepoint. At early ages the distribution is skewed to the right, but skewness reduces with  
159 age (Fig. 3D), as the distribution becomes more symmetric,

160 The longitudinal nature of the data allowed us to calculate the autocorrelation of damage.

161 Correlation time increased with age. This means that a cell with damage above or below the  
162 population average remained so for a longer at old ages (Fig. 3E). Plotting damage as a function  
163 of remaining lifetime shows that  $X=\log(\text{normalized PI uptake})$  becomes less dispersed the closer  
164 the cell is to death (Fig. 3G).

165 These findings indicate that the damage dynamics has aspects that become more deterministic  
166 with age.

167

168

169

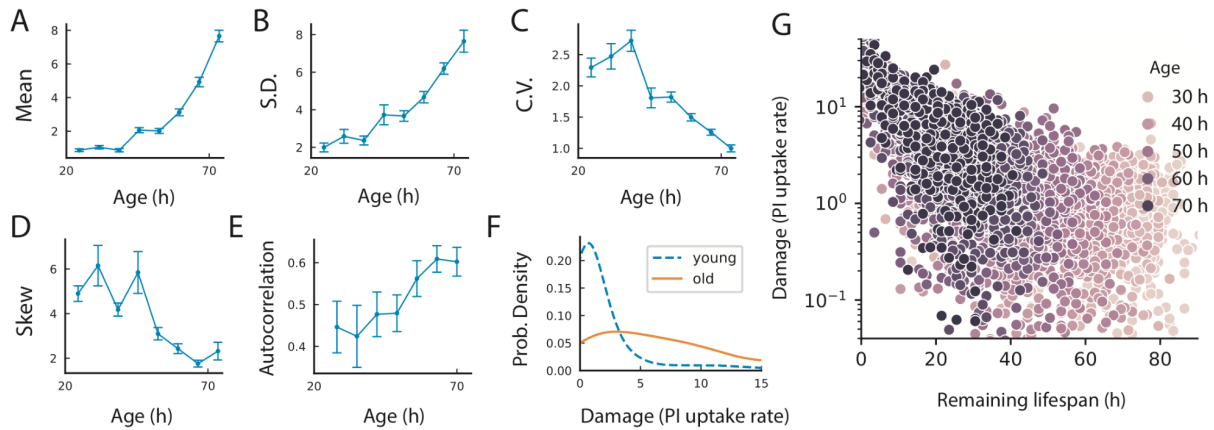

170

171

172 **Fig. 3. Damage dynamics show increasing determinism with age.** Statistics of *E. coli* membrane  
173 damage for all cells alive at a given age: Mean (A) and standard deviation (B) increase with age; but  
174 coefficient of variation (C) decreases, indicating reduced relative heterogeneity in the damage  
175 distribution. (D) Skewness drops with age. (E) Autocorrelation of damage increases with age, showing  
176 increasing persistence. (F) Probability distribution of damage in younger (52.5h blue dashed line) versus  
177 older (72.5h yellow solid line) cells. (G) Log PI uptake rate as a function of remaining lifespan becomes  
178 less variable close to death.

179

## 180 **Damage dynamics indicate a saturated-repair stochastic model**

181

182 To elucidate the stochastic mechanism that can give rise to these damage statistics, we modeled  
183 damage production and removal with noise. We exploited the separation of timescales in the  
184 data, namely the rapid fluctuations of damage around a slowly rising mean trajectory. Therefore,  
185 we explored models in which damage is produced and repaired quickly compared to the lifespan,  
186 whereas the rates of damage production and removal change slowly with age  $t$  (See Table S3 for  
187 relevant timescales). Damage removal and production were also allowed to depend on the  
188 amount of damage to include the possibility of feedback and saturation effects.

189 We use as a damage variable  $X = \log(\text{normalized PI uptake})$  to represent the loss of the free-  
190 energy barrier posed by the membrane in units of  $k_B T$ . We consider a general stochastic model  
191  $dX/dt = \text{production} - \text{removal} + \text{noise}$ , or mathematically  $dX/dt = G(X, t) + \sqrt{2\sigma}\xi$ , where  $\xi$  is  
192 white noise of amplitude  $\sigma$ .

193 To define the production and removal terms that make up  $G(X, t)$ , we used timescale separation,  
194 by assuming that at each time point the damage distribution among cells  $P(X, t)$  is a steady-state  
195 solution of the equation. The analytical solution for the steady-state is  $P(X, t) = e^{-U(X, t)/\sigma}$ ,  
196 where  $U(X, t)$  is a potential function defined by  $\partial U/\partial X = -G(X, t)$ . This is analogous to the  
197 Boltzmann distribution in statistical mechanics.

198 Using the measured distribution of damage at different timepoints,  $P(X, t)$ , we estimated  $U$ ,  
199 integrated it to provide  $G(X, t)$  and hence the production-removal terms in the model.

200 To facilitate this process, we characterized the experimental damage distributions  $P(X, t)$  by  
201 comparing them to 15 commonly-used distribution functions with 3-4 parameters (SI Fig. S2,  
202 Table S1). The best fit for the PI uptake distribution was a type-2 generalized beta distribution<sup>19</sup>  
203 with shape parameters whose ratio,  $p/(p+q)$ , rises approximately linearly with age (Fig. 1F). The  
204 stochastic process which gives rise to this distribution is (see Methods):

205

$$206 \quad (1) \quad dX/dt = \eta t - \beta f(X) + \sqrt{2\sigma}\xi$$

207

208 In this inferred mechanism (Fig 4A) damage production rises linearly with age as  $\eta t$ , and damage  
209 removal is a saturating function of damage,  $\beta f(X) = \beta e^{aX} / (e^{aX} + e^{a\kappa})$ , (Fig. 4B-C). The  
210 parameters are a production slope  $\eta = (3.2 \pm 0.3) \times 10^{-3} k_B T h^{-2}$  and removal parameters  $a =$



211  $0.33 \pm 0.03 (k_B T)^{-1}$ ,  $\beta = 0.48 \pm 0.02 k_B T h^{-1}$  and  $\kappa = 0.3 \pm 0.1 k_B T$  The white noise  
212 amplitude is  $\sigma = 0.1 \pm 0.01 (k_B T)^2 h^{-1}$ .

213 Notably, this model is in the same class as the saturated repair (SR) model established for aging  
214 in mice<sup>20</sup>, in the sense that the production rate of damage rises linearly with age and damage  
215 inhibits or saturates its own removal. The only difference is that the mouse SR model used a  
216 different saturating removal function,  $f(X) = X/(\kappa + X)$ . Hence we call the model of Eq. 1 the  
217 membrane-potential-SR model or MP-SR model.

218 The MP-SR model captures the statistics of the observed PI uptake dynamics (Fig. 4D-G). It  
219 shows a reduction in the relative variation,  $CV=SD/mean$  (Fig. 4F), despite a super-linear rise in  
220 both mean and SD (Fig. 4D-E). The inverse CV,  $1/CV$ , rises linearly with age as in the data.

221 The model also captures the reducing skewness with age (Fig. 4G). Hence, the MP-SR model  
222 captures the dynamics of damage in the experiment.

223 To compute the distribution of lifespans in the MP-SR model, we modeled death as damage  $X$   
224 exceeding a threshold  $X_c$ <sup>20</sup>. Death is therefore modeled as a first passage time process, which we  
225 computed numerically and analytically (Supplementary Information S4) using Kramer's  
226 approximation<sup>21,22</sup>. The model provides an exponential increase in the risk of death that slows at  
227 very old ages, namely the Gompertz law (Fig. 4H), and a Weibull-like sigmoidal survival curve  
228 (Fig. 4I), as experimentally observed. This Gompertzian exponential increase is due in the model  
229 to the linear rise in damage production, which causes the potential  $U$  to drop linearly with time;  
230 since crossing this barrier goes exponentially in  $U$ , the risk of death rises exponentially with  
231 time.

232 The differences in lifespan between individuals in the inferred stochastic mechanism is due to the  
233 fact that noise is effectively amplified by the saturation of damage removal. The slope of  
234 production minus removal becomes flat at old ages; fluctuations are not pulled back strongly  
235 towards equilibrium by the effective potential  $U$  (Fig. 4C). This is at the heart of how noise can  
236 generate different lifespans for cells with identical physiological parameters.

237 We conclude that PI-uptake trajectories and their reducing relative variation are well-explained  
238 by an SR-type model in which damage production (loss of membrane barrier function) rate rises  
239 linearly with age whereas damage removal saturates.

240 This SR-type model makes a further prediction that may be called 'shortening twilight'<sup>23,24</sup>.

241 Twilight is the remaining lifespan after a given damage threshold is crossed, and the SR model



242 predicts that twilight shortens with age. This shortening twilight prediction is borne out by the *E.*  
 243 *coli* damage data (SI Fig. S3).

244  
 245  
 246  
 247

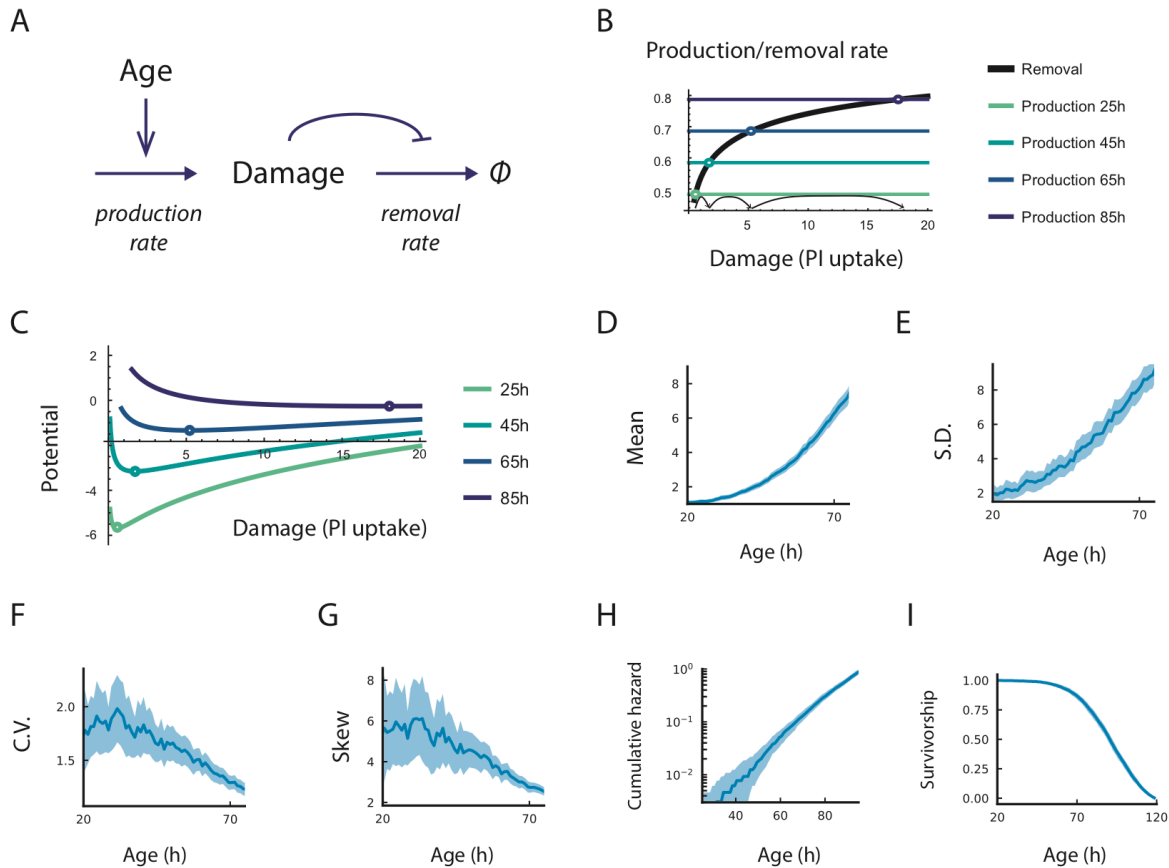

248  
 249 **Fig 4. The saturating-removal model captures damage dynamics.** (A) Schematic of the MP-SR  
 250 model. (B) rate plot showing linearly increasing production with age and a removal rate that saturates  
 251 with damage, causing the fixed point to accelerate to high damage levels. (C) The potential function of  
 252 the MP-SR model and its evolution with age. Simulations of the MP-SR model for PI uptake rate ( $e^X$ )  
 253 show rising mean (D) and standard deviation (E), reducing CV (F) and reducing skewness (G). The  
 254 model provides a death hazard that rises exponentially with age (H) and a Weibull-like survival function  
 255 (I). Blue regions are 95% confidence intervals from simulation of N=645 cells.

256

## 257 **Discussion**

258 We studied the role of chance and initial conditions on lifespan by measuring membrane damage  
259 over time in starved *E. coli* cells in a microfluidic device. Initial conditions in each cell, such as  
260 initial damage, cell size or cell-cycle phase, did not strongly correlate with time of death in most  
261 cells. Instead, damage fluctuated in each cell around a rising mean trajectory. Unexpectedly, the  
262 relative variation in damage dropped with age. This indicates an increasing determinism with  
263 age, where damage levels become more similar in relative terms the older the cells are.  
264 Correlation times increased and distributions became less skewed, further indicating rising  
265 determinism.

266  
267 We used our dynamical damage measurements to infer a stochastic mechanism that provides the  
268 dynamics and survival curves. In this mechanism, damage is produced at a rate that rises linearly  
269 with age, and damage-removal saturates at high damage levels. We called the mechanism the  
270 membrane-potential saturating repair (MP-SR) model. Our findings suggest that chance  
271 fluctuations, amplified by saturating removal of damage, play a major role in explaining why  
272 genetically identical bacterial cells in the same conditions die at different times.

273  
274 The damage dynamics measured here have statistical features that differ from random walks and  
275 from most previously suggested models of aging<sup>25-27</sup>. The mean rises faster than the standard  
276 deviation, so that the relative heterogeneity between cells at a given age declines. This can be  
277 quantitated as a drop in the coefficient of variation,  $CV=SD/mean$ , such that  $1/CV$  rises roughly  
278 linearly with age. This is an unusual feature in stochastic processes in general, and in previous  
279 theoretical models of aging including network models<sup>25,26</sup>, the Strehler-Mildvan model<sup>27</sup>, the  
280 cascading failure model<sup>7</sup>, fixed frailty model<sup>8</sup> and Ornstein-Uhlenbeck type models which do  
281 not provide a drop in damage CV with age but instead have a constant CV (SI).

282  
283 The present MP-SR mechanism has two main features that require biological explanations. The  
284 first feature is the linear rise with age of the damage production rate,  $\eta t$ . This linear rise can be  
285 explained by assuming that damage arises from ‘damage-producing units’, such as unfolded-  
286 protein complexes, that are added at a constant rate and cannot be resolved or removed<sup>28-34</sup>. If  
287 these complexes assimilate new unfolded proteins at a constant rate, and can not be removed,

288 their total mass should rise linearly with time. Such unfolded protein complexes are known to be  
289 toxic to cells<sup>31</sup>; they cause damage such as dysregulated proteostasis<sup>35</sup>, which can lead to  
290 membrane damage<sup>36,37</sup>.

291  
292 Mathematically, if cells accumulate damage-producing units  $P$  at a constant rate  $v$ , and these  
293 units cannot be removed, their number rises linearly with age,  $P = v t$ . Each unit produces  
294 damage at rate  $b$ , so that total damage production rate rises linearly with time as  $\eta t$  with  $\eta = v b$   
295 Organisms that manage to dilute such damage-producing units  $P$ , such as organisms with  
296 indefinite growth, are predicted to have different damage dynamics, in which  $P$  does not rise  
297 indefinitely. Such dilution occurs in growing and dividing bacterial cells<sup>31,32</sup>, but not in the non-  
298 growing starved cells studied here. Other examples of damage dilution may occur in eukaryotic  
299 cells with symmetric division such as fission yeast; in contrast, budding yeast with asymmetric  
300 divisions show aging and eventual death of the mother cell which retains damage rather than  
301 passing it to daughter cells.

302  
303 The second feature of the MP-SR model is the saturation of damage removal, which is crucial for  
304 the present dynamical hallmarks. The relevant removal mechanisms in *E. coli* include chaperones  
305 and proteases<sup>35</sup>, as well as enzymatic systems that repair proton leakage<sup>38</sup>, oxidative damage<sup>39</sup>  
306 and maintain membrane structural integrity<sup>40</sup>. Such enzymatic repair mechanisms should  
307 naturally saturate at high damage levels.

308  
309 Notably, the inferred stochastic mechanism in *E. coli* is similar to a mechanism inferred in the  
310 context of mice aging by Karin *et al.* Karin *et al.* used stochastic trajectories of senescent cells in  
311 mice, cells which are growth arrested cells that cause inflammation, to infer a mechanism for  
312 senescent-cell accumulation<sup>20</sup>. This mechanism, called the saturating removal (SR) model, is a  
313 stochastic differential equation with a production rate that rises linearly with age and a removal  
314 rate that saturates, so that high senescent cell levels slow their own removal. Karin *et al.*  
315 experimentally confirmed a prediction of the SR model, that senescent cell turnover slows with  
316 age<sup>20</sup>. The SR model was generalized to other forms of damage, and explains observations on  
317 aging such as the Gompertz law, heterochronic parabiosis<sup>41</sup>, age-related disease incidence in

318 humans<sup>42</sup> and the scaling of survival curves in *C. elegans*<sup>5,20</sup>. Interestingly, the human frailty  
319 index shows similar dynamical features, including a reduction in CV with age<sup>43</sup>.

320

321 The similarity between the present study on *E. coli* cells and the model of Karin *et al* on  
322 mammalian aging hints at a possible universality in mechanisms of aging, in which chance plays  
323 a large role in the differing lifespans of genetically identical organisms. Although the molecular  
324 forms of damage and lifespan timescales are very different between *E. coli* and mice, the features  
325 of linearly rising production and saturating removal may be more general and give rise to similar  
326 damage dynamics, with reducing relative heterogeneity with age.

327

328 It would be interesting to measure longitudinal damage trajectories in other organisms to explore  
329 whether linear-production-and-saturating-removal models might apply more generally. In the  
330 context of bacteria, it would be important to explore the dynamics of damage in cells challenged  
331 with antibiotics, in order to better understand the role of chance in the function of these drugs.

332

## 333 **Acknowledgement**

334

335 We thank Valery Krizhanovsky for discussions, Nicholas Stroustrup for discussion and sharing data on  
336 shortening twilight, David S. Glass for general discussions and editing help. Warm thanks to Chantal  
337 Lotton for technical lab support.

338 **Author contributions:** Conceptualization: YY, OK, ABL, UA; Methodology: YY, OK, AM, ABL, UA;  
339 Investigation: YY, AB; Software: XS; Resources: PC, ABL; Data curation: YY, AB; Formal analysis:  
340 YY, AM, UA; Visualization: YY, UA; Writing – original draft: YY, UA; Writing – review & editing:  
341 YY, UA.

342 **Funding:** European Research Council (ERC) grant agreement No 856487 (UA); Axa Foundation  
343 Longevity Chair (ABL., INSERM U1284); Bettencourt Schueller Foundation (FBS) (ABL., INSERM  
344 U1284).

345 **Competing interests:** The authors declare no competing interests.

346

## 347 **References**

- 348 1. Kirkwood, T. B. L. *et al.* What accounts for the wide variation in life span of genetically  
349 identical organisms reared in a constant environment? *Mech. Ageing Dev.* **126**, 439–443  
350 (2005).
- 351 2. Finch, C. E. *et al.* *Chance, Development, and Aging*. (Oxford University Press, 2000).
- 352 3. Rea, S. L., Wu, D., Cypser, J. R., Vaupel, J. W. & Johnson, T. E. A stress-sensitive reporter  
353 predicts longevity in isogenic populations of *Caenorhabditis elegans*. *Nat. Genet.* **37**, 894–  
354 898 (2005).
- 355 4. Yang, Y. *et al.* Temporal scaling of aging as an adaptive strategy of *Escherichia coli*. *Sci.*  
356 *Adv.* **5**, eaaw2069 (2019).
- 357 5. Stroustrup, N. *et al.* The temporal scaling of *Caenorhabditis elegans* ageing. *Nature* **530**,  
358 103–107 (2016).
- 359 6. Li, Y. *et al.* A programmable fate decision landscape underlies single-cell aging in yeast.  
360 *Science* **369**, 325–329 (2020).
- 361 7. Le Bras, H. Lois de mortalité et âge limite. *Population* **31**, 655–692 (1976).
- 362 8. Vaupel, J. W. & Missov, T. I. Unobserved population heterogeneity: A review of formal  
363 relationships. *Demogr. Res.* **31**, 659–686 (2014).
- 364 9. Jones, O. R. *et al.* Diversity of ageing across the tree of life. *Nature* **505**, 169–173 (2014).
- 365 10. Ericsson, M., Hanstorp, D., Hagberg, P., Enger, J. & Nyström, T. Sorting Out Bacterial  
366 Viability with Optical Tweezers. *J. Bacteriol.* **182**, 5551–5555 (2000).
- 367 11. Wang, P. *et al.* Robust growth of *Escherichia coli*. *Curr. Biol. CB* **20**, 1099–1103 (2010).
- 368 12. Yang, Y., Song, X. & Lindner, A. B. Chapter 2 - Time-lapse microscopy and image analysis  
369 of *Escherichia coli* cells in mother machines. in *Methods in Microbiology* (eds. Harwood, C.  
370 & Jensen, G. J.) vol. 43 49–68 (Academic Press, 2016).
- 371 13. Schink, S. J., Biselli, E., Ammar, C. & Gerland, U. Death Rate of *E. coli* during Starvation Is  
372 Set by Maintenance Cost and Biomass Recycling. *Cell Syst.* **9**, 64-73.e3 (2019).
- 373 14. Baquero, F. & Levin, B. R. Proximate and ultimate causes of the bactericidal action of  
374 antibiotics. *Nat. Rev. Microbiol.* **19**, 123–132 (2021).
- 375 15. Schink, S. *et al.* The energy requirements of ion homeostasis determine the lifespan of  
376 starving bacteria. 2021.11.22.469587 Preprint at <https://doi.org/10.1101/2021.11.22.469587>  
377 (2021).
- 378 16. Wong, F. *et al.* Cytoplasmic condensation induced by membrane damage is associated with  
379 antibiotic lethality. *Nat. Commun.* **12**, 2321 (2021).

- 380 17. Benarroch, J. M. & Asally, M. The Microbiologist's Guide to Membrane Potential Dynamics.  
381 *Trends Microbiol.* (2020) doi:10.1016/j.tim.2019.12.008.
- 382 18. Nyström, T. Stationary-phase physiology. *Annu. Rev. Microbiol.* **58**, 161–181 (2004).
- 383 19. McDonald, J. B. Some Generalized Functions for the Size Distribution of Income.  
384 *Econometrica* **52**, 647–663 (1984).
- 385 20. Karin, O., Agrawal, A., Porat, Z., Krizhanovsky, V. & Alon, U. Senescent cell turnover slows  
386 with age providing an explanation for the Gompertz law. *Nat. Commun.* **10**, 5495 (2019).
- 387 21. Berglund, N. Kramers' law: Validity, derivations and generalisations. Preprint at  
388 <https://doi.org/10.48550/arXiv.1106.5799> (2013).
- 389 22. Kramers, H. A. Brownian motion in a field of force and the diffusion model of chemical  
390 reactions. *Physica* **7**, 284–304 (1940).
- 391 23. Zhang, W. B. *et al.* Extended Twilight among Isogenic *C. elegans* Causes a  
392 Disproportionate Scaling between Lifespan and Health. *Cell Syst.* **3**, 333-345.e4 (2016).
- 393 24. Oswal, N., Martin, O. M. F., Stroustrup, S., Bruckner, M. A. M. & Stroustrup, N. A  
394 Hierarchical Process Model Links Behavioral Aging and Lifespan in *C. elegans*.  
395 2021.03.31.437415 Preprint at <https://doi.org/10.1101/2021.03.31.437415> (2021).
- 396 25. Vural, D. C., Morrison, G. & Mahadevan, L. Aging in complex interdependency networks.  
397 *Phys. Rev. E* **89**, 022811 (2014).
- 398 26. Kaplan, Y. *et al.* Observation of universal ageing dynamics in antibiotic persistence. *Nature*  
399 **600**, 290–294 (2021).
- 400 27. Strehler, B. L. & Mildvan, A. S. General Theory of Mortality and Aging. *Science* **132**, 14–21  
401 (1960).
- 402 28. Schramm, F. D., Schroeder, K. & Jonas, K. Protein aggregation in bacteria. *FEMS*  
403 *Microbiol. Rev.* **44**, 54–72 (2020).
- 404 29. Ben-Zvi, A., Miller, E. A. & Morimoto, R. I. Collapse of proteostasis represents an early  
405 molecular event in *Caenorhabditis elegans* aging. *Proc. Natl. Acad. Sci. U. S. A.* **106**,  
406 14914–14919 (2009).
- 407 30. Labbadia, J. & Morimoto, R. I. The Biology of Proteostasis in Aging and Disease. *Annu.*  
408 *Rev. Biochem.* **84**, 435–464 (2015).
- 409 31. Lindner, A. B., Madden, R., Demarez, A., Stewart, E. J. & Taddei, F. Asymmetric  
410 segregation of protein aggregates is associated with cellular aging and rejuvenation. *Proc.*  
411 *Natl. Acad. Sci.* **105**, 3076–3081 (2008).
- 412 32. Proenca, A. M., Rang, C. U., Qiu, A., Shi, C. & Chao, L. Cell aging preserves cellular  
413 immortality in the presence of lethal levels of damage. *PLOS Biol.* **17**, e3000266 (2019).

- 414 33. David, D. C. *et al.* Widespread protein aggregation as an inherent part of aging in *C.*  
415 *elegans*. *PLoS Biol.* **8**, e1000450 (2010).
- 416 34. Moreno, D. F. *et al.* Proteostasis collapse, a hallmark of aging, hinders the chaperone-Start  
417 network and arrests cells in G1. *eLife* **8**, e48240 (2019).
- 418 35. Santra, M., Farrell, D. W. & Dill, K. A. Bacterial proteostasis balances energy and chaperone  
419 utilization efficiently. *Proc. Natl. Acad. Sci.* **114**, E2654–E2661 (2017).
- 420 36. Kohanski, M. A., Dwyer, D. J., Wierzbowski, J., Cottarel, G. & Collins, J. J. Mistranslation of  
421 membrane proteins and two-component system activation trigger antibiotic-mediated cell  
422 death. *Cell* **135**, 679–690 (2008).
- 423 37. Akiyama, Y. Quality control of cytoplasmic membrane proteins in *Escherichia coli*. *J.*  
424 *Biochem. (Tokyo)* **146**, 449–454 (2009).
- 425 38. Kobayashi, R., Suzuki, T. & Yoshida, M. *Escherichia coli* phage-shock protein A (PspA)  
426 binds to membrane phospholipids and repairs proton leakage of the damaged membranes.  
427 *Mol. Microbiol.* **66**, 100–109 (2007).
- 428 39. Denoncin, K. *et al.* A new role for *Escherichia coli* DsbC protein in protection against  
429 oxidative stress. *J. Biol. Chem.* **289**, 12356–12364 (2014).
- 430 40. Nakayama, T. & Zhang-Akiyama, Q.-M. *pqiABC* and *yebST*, Putative *mce* Operons of  
431 *Escherichia coli*, Encode Transport Pathways and Contribute to Membrane Integrity. *J.*  
432 *Bacteriol.* **199**, e00606-16 (2017).
- 433 41. Karin, O. & Alon, U. Senescent cell accumulation mechanisms inferred from parabiosis.  
434 *GeroScience* **43**, 329–341 (2021).
- 435 42. Katzir, I. *et al.* Senescent cells and the incidence of age-related diseases. *Aging Cell* **20**,  
436 e13314 (2021).
- 437 43. Rockwood, K. & Mitnitski, A. Frailty in Relation to the Accumulation of Deficits. *J. Gerontol.*  
438 *Ser. A* **62**, 722–727 (2007).
- 439



## 440 Methods

441

### 442 Experimental and analytical methods

443

444 **Microfluidic chip fabrication.** The negative master mould for the modified mother machines  
445 was fabricated on top of silicon wafers in two steps. First, arrays of dead-end channels (2000x 6  
446  $\mu\text{m}$  long) were fabricated via electron-beam lithography (EBL) in a specialized micro-fabrication  
447 facility. It was necessary to use EBL for these channels due to the high precision requirements  
448 for the cross section dimensions (both height and width have to be between 1.1 and 1.2  $\mu\text{m}$ ).  
449 They had to be large enough to allow single cells to enter yet narrow enough so that multiple  
450 cells could not be squeezed in the same channel. In the second step, using standard  
451 photolithography methods, the negative mould for the main channel was overlaid perpendicular  
452 to the dead-end channels. The main channel is 10mm long, 50 $\mu\text{m}$  wide and 10 $\mu\text{m}$  deep.  
453 For each run of the bacterial starvation experiment, microfluidic chips were fabricated by casting  
454 PDMS structures out of negative master moulds. Uncured PDMS mixes (RTV-615, Momentive  
455 Performance Materials) were poured to a thickness of 3mm onto the silicon wafer carrying the  
456 master moulds, and then de-gassed under vacuuming and spread out via gravity for about 2  
457 hours. The PDMS was then partially heat cured at 80°C for about an hour to form solid yet  
458 flexible PDMS blocks with patterned surfaces. After drilling inlets and outlets through the flow  
459 channel, the PDMS blocks were bound to cover glasses suitable for microscopy, using oxygen  
460 plasma (90 s, 1000 mTorr). Lastly, the assemblies were cured fully at 80°C overnight and so that  
461 the PDMS structure was sealed permanently to the glass cover slide.  
462 On the day of the experiment, the microfluidic chip was again treated by oxygen plasma for 90s  
463 so that its surfaces were activated, and then injected with 20% (v/v) polyethylene glycol 400  
464 solution for at least 1h to prevent bacterial adhesion.

465

466 **Material and equipment.** During the process of media preparation, sterilization, cell culture and  
467 fluidic infusion, we generally avoided disposable lab plasticware in favor of glass or equipment  
468 whose wetted surfaces are coated with fluoropolymer such as polytetrafluoroethylene (PTFE).  
469 This step avoided a pitfall in which trace concentrations of carbon and energy-rich chemicals  
470 leached into the media, such as phthalate plasticisers commonly used in PVC tubings. Such



471 compounds can serve as carbon sources and allow the cells to grow, circumventing the goal of  
472 our experiments<sup>4</sup>. Medium was filter-sterilized (0.2 µm) to avoid contamination by volatiles  
473 during autoclaving, and glassware was sterilized by dry heat. In the mother machine chips we  
474 subjected a relatively small number of cells (<10,000) to constantly refreshing volumes (5 µl per  
475 hour) of media.

476

477 **Bacterial growth and loading.** Bacterial cultures were loaded into the microfluidic chip via  
478 centrifugation. All culture media were filter-sterilized before use to remove dust particles, which  
479 might otherwise block the microfluidic channels. *E. coli* wildtype strain MG1655 with a  
480 chromosomal-inserted constitutively CFP-expressing cassette (PrnB2) was grown overnight in  
481 M9 minimal media (supplemented by 2mM MgSO<sub>4</sub>, and 0.1 mM CaCl<sub>2</sub>) at 37°C with 40mM  
482 succinate as carbon source, and diluted 250 fold into 50ml of the same media in 250-ml  
483 Erlenmeyer flasks. This subculture was grown to exponential phase (OD<sub>600</sub> ~ 0.1) at 37°C and  
484 then transferred to glass centrifugation tubes and harvested by centrifugation at 4000rpm for  
485 15min. The bacterial pellet was resuspended, washed with fresh carbon-free M9 media and  
486 centrifuged 3 more times. The resulting pellet was resuspended a final time with 20µl M9 media.  
487 This final suspension was manually injected into the main channel of the microfluidic chip, and  
488 forced into the dead-end channels by centrifugation at 1000rpm for 15min. After centrifugation,  
489 the main channel is washed thoroughly by carbon-free M9 media to remove all cells that remain  
490 there.

491

492 **Microfluidic and microscopy setup.** After the microfluidic chip was loaded with cells, it was  
493 connected to a linear, flow-controlled fluidic system driven by a high-precision syringe pump  
494 (Harvard Apparatus PHD 2000 Programmable) and GC-grade glass/PTFE syringes (Hamilton  
495 Gaslight 1000 series). As mentioned previously, PTFE tubing and glass syringes are used to  
496 avoid leaching of plasticizers into the media. This is critical for this type of microfluidic  
497 starvation experiments, as *E. coli* are able to uptake as carbon sources the trace concentrations of  
498 plasticizers in the media when it is constantly refreshed by the microfluidic flow. The syringes  
499 are preloaded with filter-sterilized M9 minimal media without carbon source, supplemented with  
500 propidium iodide (PI, 5 µg/ml). The chip was first washed at 100µl per hour for 30 min and then  
501 the flow rate was halved every 15 min to a final flow rate of 5µl per hour. In the meantime, the

502 chip was mounted and stabilized onto the objective stage of an inverted microscope (Nikon  
503 ECLIPSE Ti2, 100× oil-immersion objective, controlled with MetaMorph software) with  
504 temperature controlled at 37°C. Phase-contrast and fluorescence (PI signal excitation, 546/12  
505 nm; emission, 605/75 nm; CFP excitation 436/20nm; emission 480/40nm) images were  
506 automatically taken for up to 90 imaging positions every hour for up to 120 hours. Focus was  
507 maintained by the hardware-based Perfect Focus System (PFS) from Nikon.

508

509 **Image analysis.** We used a published image analysis method specifically designed for mother  
510 machines<sup>12</sup>. The regions in the time-lapse images of each dead-end channel were detected and  
511 cut out of the image stacks and displayed chronologically from left to right on the same image.  
512 Cells were segmented using the CFP (constitutively expressed) fluorescent image. The  
513 segmentation approach was semi-automatic and consisted of automatic segmentation, lineage  
514 assignment and manual correction. First, the central region of the cells was detected using  
515 statistical p-value thresholding, assuming that the observed intensities are spatially distributed as  
516 Gaussian functions. Then these central regions were used as seeds to add recursively neighboring  
517 points with similar intensities to form labeled regions. The result of this automatic process is an  
518 accurately segmented image with occasional over segmentation errors. Then labeled regions  
519 from different time points in the same dead-end channels were assigned together with arrows to  
520 track the same cell through time. These automatically segmented and tracked cells are then  
521 manually corrected to account for over-segmentation errors and mis-assignment due to sudden  
522 movements of the cells. For more details see<sup>12</sup>. For each segmented and tracked cell through  
523 time, we used the segmented CFP contours to extract the average PI fluorescence signal.

524

## 525 **Modeling and statistical methods**

526

527 **Measurements of membrane damage.** Our general approach is to use the time derivative of  
528 fluorescence to calculate the rate constant of PI uptake, which in turn is a proxy for membrane  
529 damage.

530 We model the PI fluorescence time series with one slow and one fast chemical reaction. The  
531 slow reaction is PI uptake  $PI_{ext} \rightarrow PI_{in}$  with rate constant  $r$ , and the fast reaction is PI binding to

532 DNA once inside the cell  $[PI]_{in} + [DNA] \Leftrightarrow [PI:DNA]$ , assumed reversible and at equilibrium  
533 with equilibrium constant  $K$ , so that  $K[DNA][PI]_{in} = [PI:DNA]$ .

534 First we focus on the rate of PI uptake. The Arrhenius equation states that the logarithm of the  
535 rate constant scales linearly with activation energy, in this case, an energetic barrier representing  
536 the integrity of the cell membrane. Thus we defined membrane damage  $X(t)$  as the reduction of  
537 this energy barrier compared to a healthy baseline.  $X(t)$  has the unit of  $k_B T$ , where  $T$  is the  
538 experimental temperature 310K and  $k_B$  is the Boltzmann constant. We can choose the unit  
539 appropriately, i.e. to be  $k_B T$ ,  $X(t)$  can be made unitless. Under these definitions, the rate constant  
540 is  $r = A_0 e^{X(t)}$ , where  $T$  is the experimental temperature 310K and  $k_B$  is the Boltzmann constant.  
541 Then the PI uptake rate is  $A_0 e^{X(t)} ([PI]_{ext} - [PI]_{in})$ .

542 Having defined the relation between membrane damage and PI uptake rate, our task is the  
543 estimation of the latter using fluorescence time-series. Since PI only becomes fluorescent when  
544 bound to DNA, average fluorescence intensity is proportional to the bound form of PI:  $[Fluo] =$   
545  $J_F [PI:DNA]$ . Since the binding of PI to DNA is assumed to be at equilibrium, we have

546  $[PI:DNA] = ([PI]_{in} + [PI:DNA]) \frac{K[DNA]}{1+K[DNA]}$ . Thus the time derivative of fluorescence should  
547 be proportional to the PI uptake rate:

$$548 \quad \frac{d[Fluo]}{dt} = A_0 e^{X(t)} ([PI]_{ext} - [PI]_{in}) \frac{J_F K[DNA]}{1+K[DNA]}$$

549 To obtain relative fluorescence time-series we normalize for each cell its fluorescence signal  
550  $[Fluo]$  by its observed maximum  $[Fluo]_{max} = J_F K[DNA][PI]_{ext}$ . The relative time series is  
551 thus  $s(t) = [Fluo]/[Fluo]_{max} = [PI]_{in}/[PI]_{ext}$ . Membrane damage can be calculated from the  
552 experimentally observed relative fluorescence  $s(t)$ :

$$553 \quad \frac{ds(t)}{dt} = \frac{d[Fluo]}{dt} / [Fluo]_{max} = \frac{A_0 e^{X(t)}}{1 + K[DNA]} [1 - s(t)]$$

554 and thus we obtain the formula used in our analysis

$$555 \quad A_l e^{X(t)} = \frac{ds(t)/dt}{1-s(t)},$$

556 where  $A_l = A_0 / (1 + K[DNA])$ .

557

558  $A_l$  is an Arrhenius-type pre-exponential factor with a unit of inverse time. It is assumed to be  
559 constant, because DNA concentration should be constant among the non-growing cells in our

560 experiment. The value of  $A_I$  is not relevant to the dynamics of damage, thus we used  
561  $A_I = 1/600$  so that initial timepoints start close to PI uptake rates of 1.

562

563 **Time-series analysis and numerical differentiation.** The fluorescence series was zeroed by the  
564 background and then divided by the maximum fluorescence for each cell to arrive at  $s(t)$  defined  
565 above. To arrive at estimates for PI uptake rate,  $\frac{ds(t)/dt}{1-s(t)}$ , we performed numerical differentiation  
566 of  $s(t)$  in a fashion that reduces the impact of experimental noise. In the present time-lapse  
567 microscopy experiments where single cells inside microfluidic chambers are imaged,  
568 experimental noise is driven by fluctuations in focus on the z-axis. This type of noise is  
569 approximately multiplicative and non-correlated in neighboring 1h time points (see Fig. S1). We  
570 therefore smoothed the log-transformed data  $\ln[s(t)]$  in time windows of 7h with a Wiener filter.  
571 Then  $d\ln[s(t)]/dt$  were estimated using linear regression in non-overlapping 7h windows. The  
572 resulting time derivatives are multiplied by the  $s(t)/[1-s(t)]$  to arrive at  $A_I e^{X(t)}$ .

573 The typical values of  $X(t)$  during the lifetime of the bacteria begin around  $0.01X_c$  and rise to  
574 cross  $X_c$  at 80-100h.

575

576 **Marginal damage distributions.** We searched for an analytical form for the probability  
577 distribution function that can fit the damage distributions at various ages with age-dependent  
578 parameters. We tested 15 commonly used probability distributions. Each distribution has a  
579 probability density function  $f(Z/\sigma; \Theta)$ , where  $Z$  is the value of the random variable,  $\Theta$  is the  
580 vector for the shape parameters and  $\sigma$  is the scaling parameter. We fit this to the empirical  
581 damage distribution  $Z_{it}$  of cell  $i$  at age  $t$ , by maximizing the likelihood  $\sum_i f(Z_{it}/\sigma_t; \Theta_t)$  as a  
582 function of parameters  $\sigma_t, \Theta_t$ , using the `scipy.stats` package of python. The goodness of fit was  
583 evaluated by the one-sample Kolmogorov-Smirnov (K-S) test. The tested distributions, the K-S  
584 test statistics and associated p-value are shown in Table S1 and Figure S1.

585 The three distribution functions that best fit the marginal damage distributions, Burr, Burr12 and  
586 Fisk, are all special cases of the generalized beta distribution of the second kind (GB2)<sup>19</sup>, whose  
587 probability density function is:

588 
$$f_{GB2}(Z) = a b^{aq} Z^{ap-1} (b^a + Z^a)^{-p-q} / \text{Beta}(p, q),$$

589

590 where  $p$  and  $q$  are dimensionless shape parameters, and  $a$  and  $b$  describe the cooperativity and  
 591 scale of the observed damage proxy  $Z$ , the PI uptake rate. GB2 becomes a Burr (Burr Type III)  
 592 distribution when  $q=1$  and a Burr12 distribution when  $p=1$ , and the Fisk distribution when  
 593  $p=q=1$ . Since the damage we seek is  $X=\ln(Z)$ , we transform to obtain:

594

595

$$596 \quad (2) P(X) = f_{GB2}(Z) dZ/dX \sim e^{apX} (b^a + e^{aX})^{-p-q} .$$

597

598 **Derivation of the MP-SR model.** We model the dynamics with a stochastic differential equation  
 599 (SDE) in the form of

600

$$601 \quad (3) dX/dt = G(X, t) + \sqrt{2\sigma}\xi = \text{production} - \text{removal} + \sqrt{2\sigma}\xi,$$

602

603 where both production and removal rates of damage can depend on damage level  $X$  and age  $t$ .

604 We assume that the production and removal of damage happen much faster than the age-related

605 change in parameters. Thus we can make the approximation that the observed damage

606 distributions in the previous section are quasi-steady-state distributions of the SDE. The quasi-

607 steady-state distribution can be written as the Boltzmann distribution  $P(X) \sim e^{-U(X,t)/\sigma}$ , where

608 the potential function  $U$  is defined by  $G(X, t) = -\partial U/\partial X$ .

609 Using the best-fit GB2 distribution  $P(X)$  of Eq (2), we find the potential up to an irrelevant

610 constant:

$$611 \quad U(X, t) = \sigma(p + q)\ln(b^a + e^{aX}) - \sigma apX .$$

612 The two terms of this potential function naturally relate to damage production and removal

613 terms. Thus, via differentiation of  $U$  with respect to  $X$  we find:

$$614 \quad \text{production} = \sigma ap, \text{removal} = \sigma a(p + q) e^{aX} / (e^{aX} + e^{a\kappa}).$$

615 By redefining the GB2 parameters  $b = e^\kappa, p = \eta_t/a\sigma, q = (\beta_t - \eta_t)/a\sigma$ , the MP-SR model for

616 damage dynamics in *E. coli* is given by:

$$617 \quad dX/dt = \eta_t - \beta_t e^{aX} / (e^{aX} + e^{a\kappa}) + \sqrt{2\sigma}\xi.$$

618 The GB2 parameters that best fit the experimental data show that  $p/(p+q)$  rises approximately

619 linearly with time (Fig. 1F) and that  $b$  and  $a$  remain approximately constant. We conclude that

620 the observed damage distributions are well-described by an SR-type process with  $\eta_t = \eta t$  and

621  $\beta_t = \beta$ , as in Eq 1.

622

623 **Supplementary materials:**

624

625 **Table of Contents**

626

627 **S1 Estimated of experimental noise** 27

628 **S2 Best fit distribution functions to experimental damage distributions** 28

629 **S3 Shortening twilight in the E. coli dataset** 30

630 **S4 Parameters, timescales and dimensionless groups of SR-models** Error! Bookmark not  
631 defined.

632 **S5 Ultimate and proximate causes of aging** Error! Bookmark not defined.

633

634

635

636

637

638

639 **S1 Estimated of experimental noise**

640

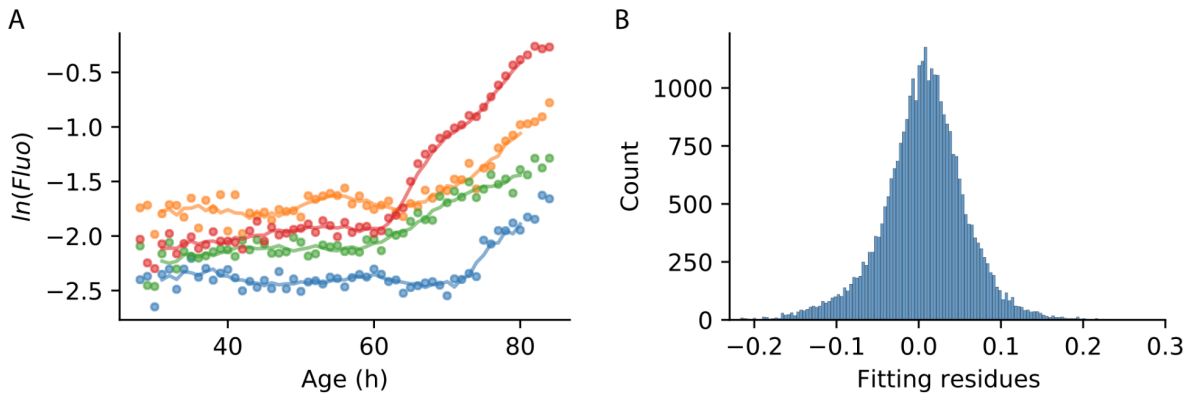

641  
642 **Figure S1** Estimation of experimental noise. (A) Data derived from time-lapse microscopic  
643 images (dots) is assumed to be composed of a relatively slow moving signal (curves) and  
644 sequentially independent multiplicative experimental noise. The curves are moving averages of  
645 7h with min and max value removed. The difference between these curves and the raw data in  
646 log scale, i.e. the fitting residues, is our estimate of experimental noise. (B) Histogram of the  
647 fitting residues. The mean of this distribution is approximately zero,  $0.02 \pm 0.03XX$ , and the  
648 standard deviation approximates the magnitude of experimental noise, about 5.5%. The left half  
649 of this distribution was used to estimate the magnitude of the experimental noise, because the  
650 distribution is skewed to the right due to the generally rising trends of PI signal.  
651

## 652 S2 Best fit distribution functions to experimental damage 653 distributions

654 In this section we provide details for the fits of the 15 distribution functions to the experimental  
655 *E. coli* damage distributions at different ages. We provide the KS statistic (Table S1) and p-  
656 value (Fig S2), where a higher KS p-value (bluer colors) means a better fit. The distributions are  
657 ordered according to goodness of fit (average log p-value).



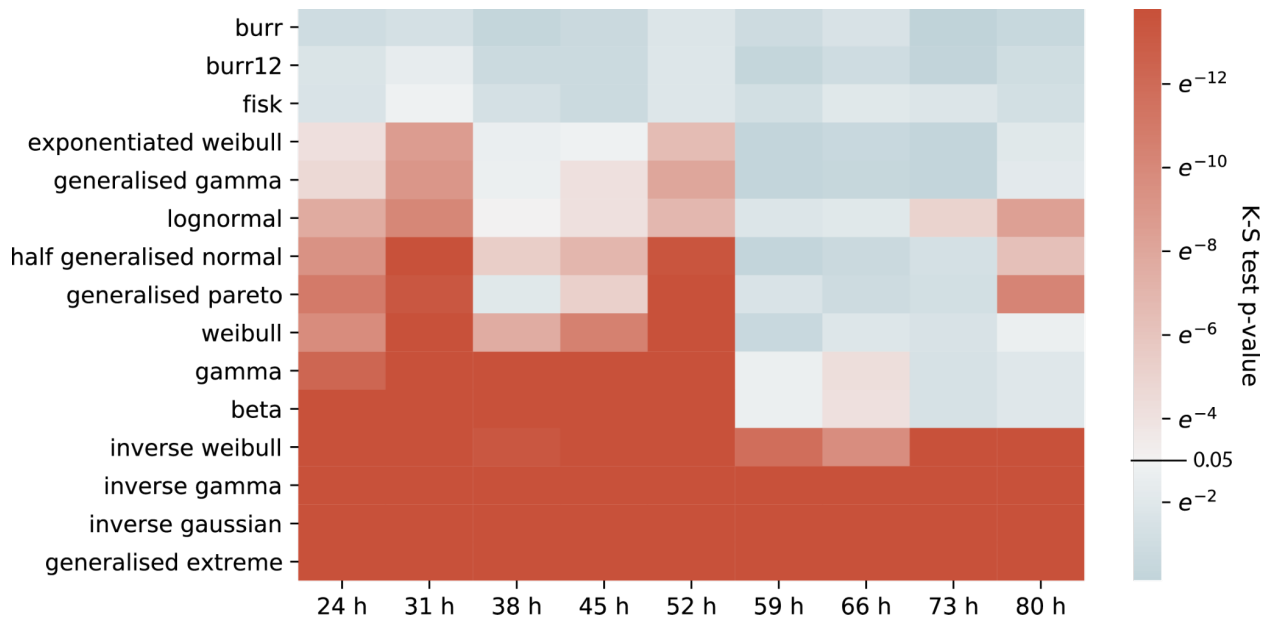

658

659 **Figure S2** KS test p-values for 15 distribution functions to the marginal damage distributions at  
 660 different timepoints. Functions are ordered by mean p-value.

661

662

| Model                 | K-S statistic |       |       |       |       |       |       |       |       |
|-----------------------|---------------|-------|-------|-------|-------|-------|-------|-------|-------|
|                       | 24.5h         | 31.5h | 38.5h | 45.5h | 52.5h | 59.5h | 66.5h | 73.5h | 80.5h |
| burr                  | 0.042         | 0.046 | 0.035 | 0.038 | 0.047 | 0.048 | 0.046 | 0.027 | 0.038 |
| burr12                | 0.051         | 0.057 | 0.041 | 0.038 | 0.048 | 0.038 | 0.040 | 0.029 | 0.046 |
| fisk                  | 0.049         | 0.061 | 0.048 | 0.038 | 0.048 | 0.052 | 0.051 | 0.051 | 0.048 |
| exponentiated weibull | 0.073         | 0.098 | 0.062 | 0.060 | 0.080 | 0.037 | 0.034 | 0.031 | 0.058 |
| generalized gamma     | 0.076         | 0.101 | 0.063 | 0.069 | 0.088 | 0.036 | 0.033 | 0.032 | 0.059 |
| lognormal             | 0.095         | 0.106 | 0.067 | 0.069 | 0.082 | 0.060 | 0.051 | 0.078 | 0.106 |

|                         |       |       |       |       |       |       |       |       |       |
|-------------------------|-------|-------|-------|-------|-------|-------|-------|-------|-------|
| half generalized normal | 0.104 | 0.129 | 0.085 | 0.087 | 0.112 | 0.036 | 0.036 | 0.045 | 0.093 |
| generalized pareto      | 0.112 | 0.121 | 0.056 | 0.077 | 0.115 | 0.058 | 0.039 | 0.044 | 0.116 |
| weibull                 | 0.106 | 0.142 | 0.099 | 0.106 | 0.129 | 0.043 | 0.050 | 0.049 | 0.064 |
| gamma                   | 0.118 | 0.166 | 0.141 | 0.150 | 0.153 | 0.070 | 0.069 | 0.048 | 0.057 |
| beta                    | 0.127 | 0.166 | 0.140 | 0.149 | 0.156 | 0.070 | 0.068 | 0.048 | 0.057 |
| inverse weibull         | 0.152 | 0.284 | 0.129 | 0.136 | 0.153 | 0.134 | 0.100 | 0.140 | 0.202 |
| inverse gamma           | 0.214 | 0.461 | 0.185 | 0.239 | 0.253 | 0.223 | 0.135 | 0.195 | 0.281 |
| inverse gaussian        | 0.220 | 0.784 | 0.201 | 0.280 | 0.279 | 0.326 | 0.152 | 0.216 | 0.316 |
| generalized extreme     | 0.376 | 0.394 | 0.373 | 0.374 | 0.396 | 0.369 | 0.372 | 0.372 | 0.387 |

663

664

665 **Table S1** Kolmogorov-Smirnov (KS) test statistics for the 15 distribution functions compared to  
666 the marginal damage distributions at different timepoints.

667

668

### 669 S3 Shortening twilight in the *E. coli* dataset

670

671 We follow the pioneering work of Stroustrup et al and explore the question of twilight, the time  
672 from a measurable age related phenotype to the time of death<sup>24</sup>. Suppose there is a  
673 measurable age-related phenotype that is equivalent to damage crossing a threshold X1. If we  
674 define twilight<sup>23</sup> as the remaining lifespan after the threshold is crossed, the question is  
675 whether twilight shortens or lengthens with the age at which the threshold is crossed.

676  
677  
678  
679  
680  
681  
682  
683  
684  
685  
686

The SR model predicts that twilight shortens with age on average (Fig S3ABC). Equivalently, the time to cross X1, denoted  $t_1$ , should be positively correlated with time of death  $t_d$ , but with a correlation coefficient less than one (Fig S3B).

The reason for the shortening twilight is that the damage production term  $\eta t$  rises with age. Individuals that cross X1 at early times have a low production term. It takes them longer to reach the death threshold than those crossing X1 at late times. Thus there is a negative correlation between  $t_1$  and remaining lifespan (Fig S3C). This prediction is borne out by the *E. coli* dataset (Fig S3D). A similar effect was observed in aging *C. elegans*<sup>24</sup>.

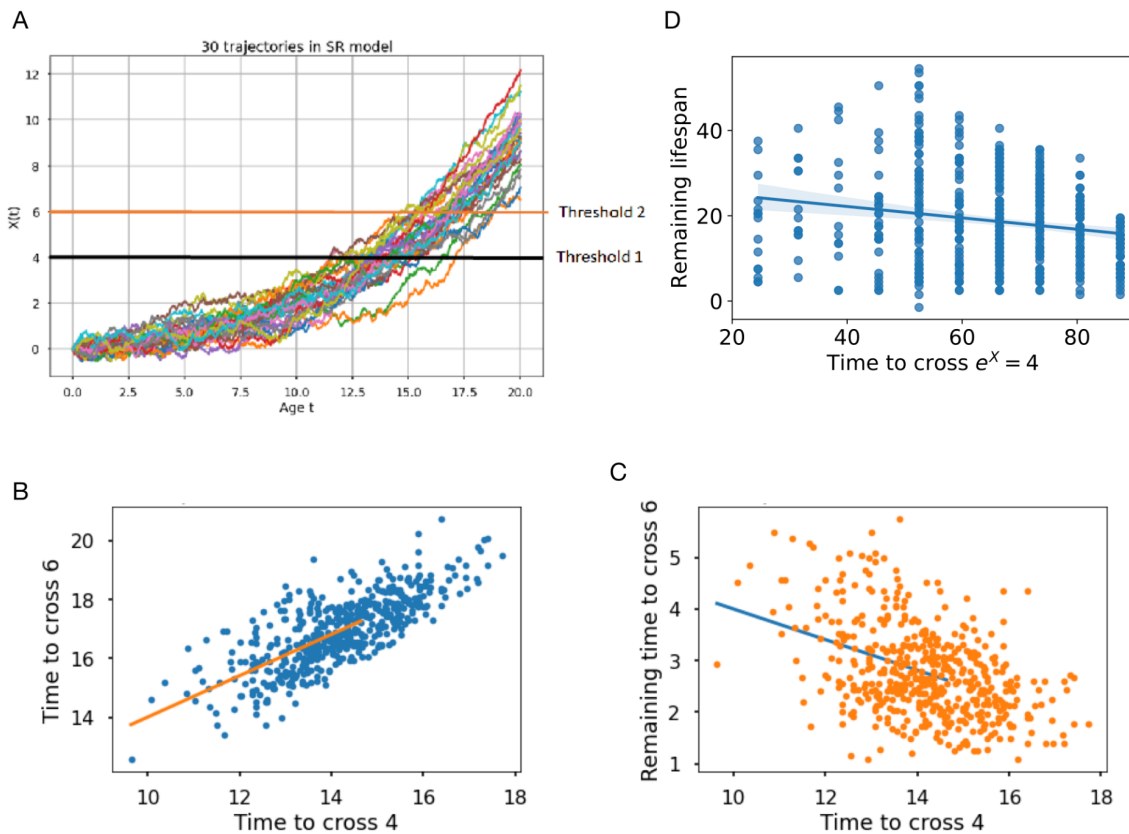

687  
688

**Figure S3** *E. coli* shows shortened twilight at old age. (A) SR model simulation with parameters  $\eta = 0.1, \beta = k = 1$ . Thresholds are 4 and 6. (B) Time to cross the two thresholds is correlated but with slope less than 1 (regression slope  $\sim 0.7$ ). (C) Remaining lifespan (remaining time to

692 cross threshold 6 after threshold 4 is crossed) drops with time to cross threshold 4. (D)  
 693 Correlation of remaining lifetime with time to cross a damage threshold of  $e^X=4$  in the *E. coli*  
 694 dataset. Regression line is  $y=-0.13x+27.5$ .

695  
 696

## 697 S4 Analytical properties of the MP-SR model

698  
 699 Here, we derive the risk of death of the MP-SR model analytically, using Kramer's  
 700 approximation.

701  
 702 The model equation is:

$$703 \quad dX/dt = \eta t - \beta e^{aX} / (e^{aX} + e^{a\kappa}) + \sqrt{2\sigma}\xi$$

704 One can write this in terms of a potential function  $U(X, t)$  (Fig. 4C) :

$$705 \quad dX/dt = -\partial U(X, t)/\partial X + \sqrt{2\sigma}\xi,$$

706 where the potential function is:

$$707 \quad U(X, t) = -\eta t X + \beta/a \ln(e^{a\kappa} + e^{aX})$$

708  
 709 We model mortality as the first time when  $X > X_c$ . Thus, death time is a first-passage time of the  
 710 MP-SR model variable  $X$ . To estimate the risk of death, i.e. hazard rate, we apply the Kramer  
 711 approximation<sup>21,22</sup> for the first passage time:

$$712 \quad h(t) \approx \frac{\sqrt{U''(X_0)U''(X_c)}}{2\pi} e^{-\frac{U(X_c)-U(X_0)}{\sigma}}$$

713 Where  $X_0$  is the steady state of the system.

714 To arrive at Gompertz law, one needs  $-\frac{U(X_c)-U(X_0)}{\sigma}$  to increase linearly with age. This is indeed  
 715 the case:

$$716 \quad -\frac{U(X_c)-U(X_0)}{\sigma} = t\eta\sigma^{-1}(X_c - X_0) + \beta a^{-1}\sigma^{-1}[z(X_0) - z(X_c)],$$

717 Where  $z(x) = \ln(e^{ax} + e^{a\kappa})$ . If the quasi-steady-state  $X_0$  is constant and much smaller than  $X_c$ ,  
 718 as it is at young ages, one obtains the Gompertz hazard rate  $h(t) \sim e^{\frac{\eta X_c}{\sigma}t}$  with the Gompertz  
 719 slope  $\eta\sigma^{-1}X_c$ .

720

721 However, the quasi-steady state  $X_0$  does increase with age, and rises more rapidly at late ages  
722 approaching  $X_c$  (Fig. 4B). Thus the hazard rate is only approximately Gompertzian, especially at  
723 late ages. If we use the quasi-steady state  $X_0 = \ln\left(\frac{t\eta}{\beta - t\eta}\right)/a$  to calculate the hazard rate, we get  
724 a more complicated, non-Gompertzian formula, plotted in Fig. S4. This more realistic result  
725 shows late-age deceleration when compared with the Gompertz law. This deceleration is  
726 indeed observed experimentally for *E. coli* in similar conditions <sup>4</sup>.  
727

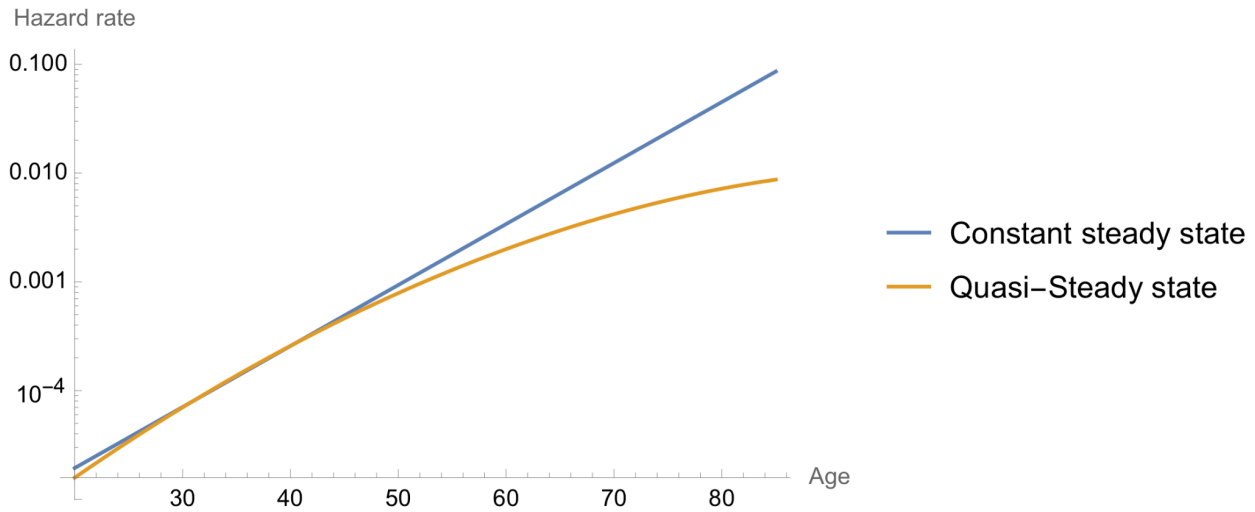

728  
729  
730 **Figure S4** Analytically calculated hazard rate of the MP-SR model using Kramer's  
731 approximation. The two curves follow different assumptions: Blue curve shows Gompertz law,  
732 under the constant steady state assumption. Yellow curve uses a quasi-steady state that  
733 changes with age and shows late-age deceleration.

A

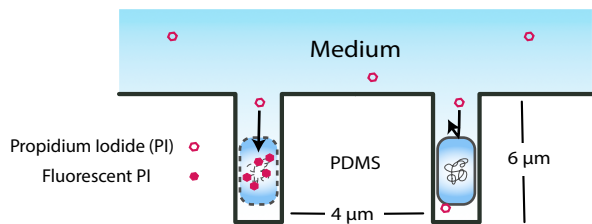

B

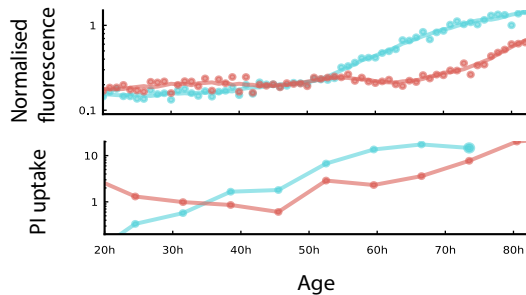

C

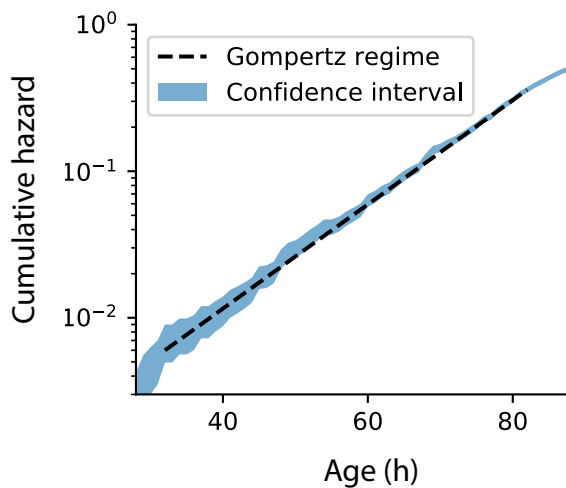

D

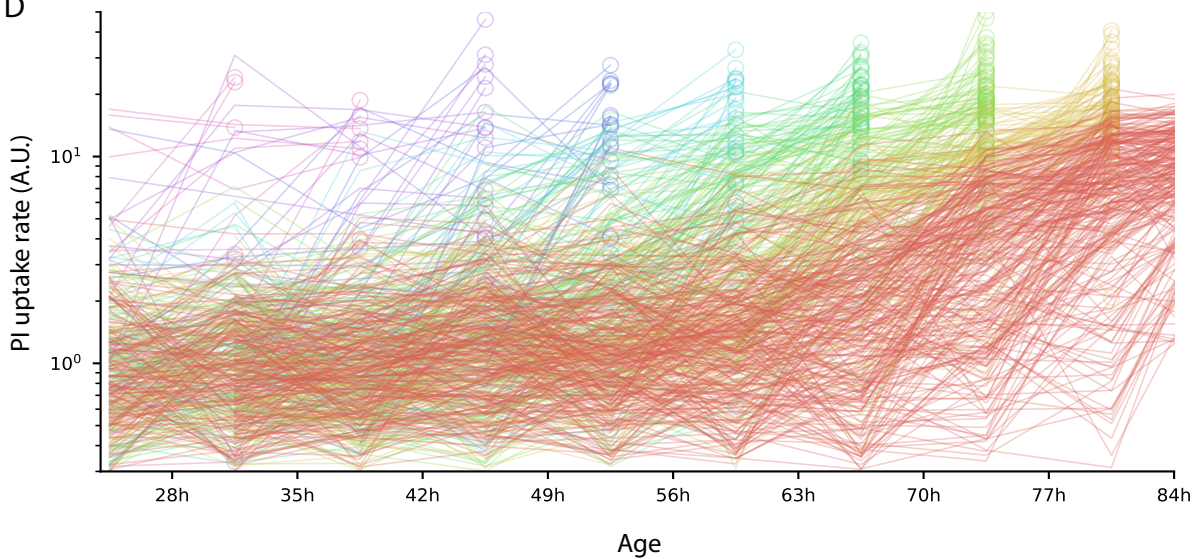

E

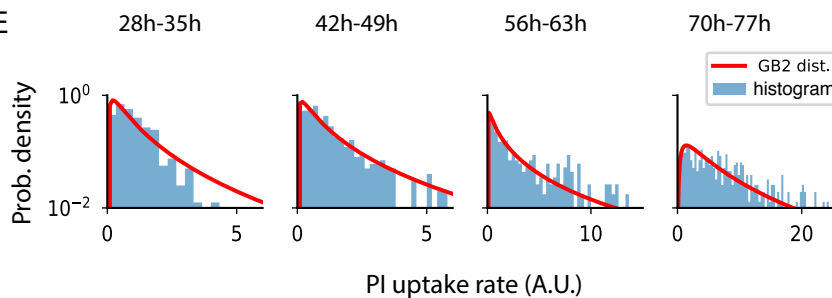

F

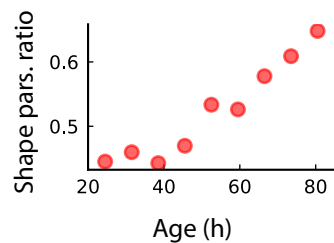

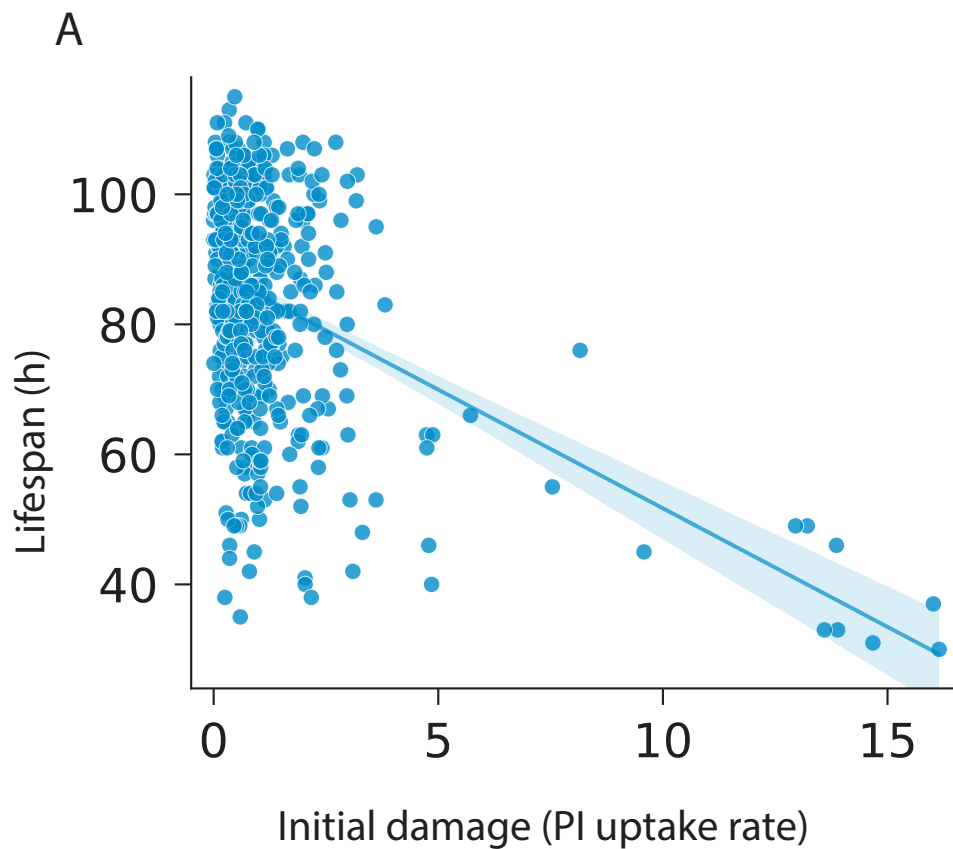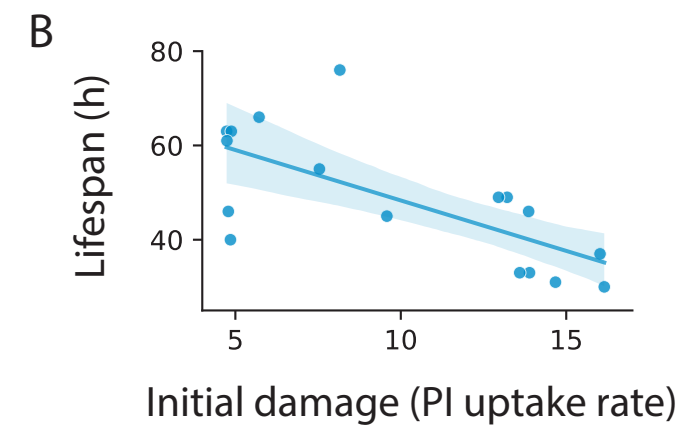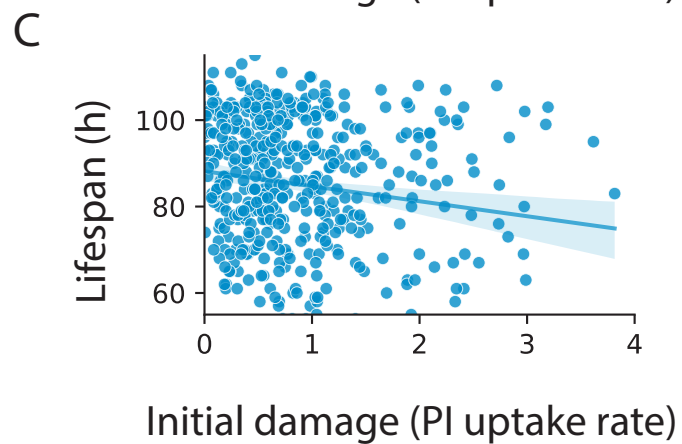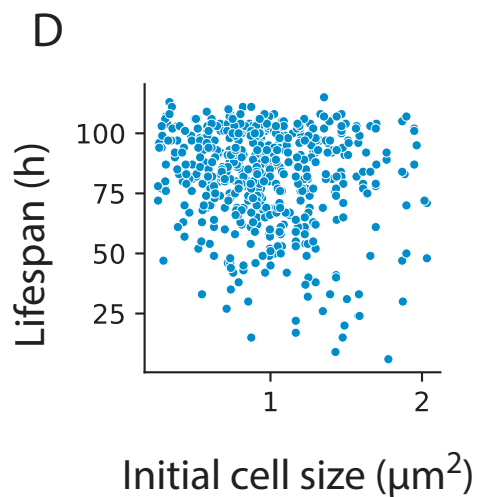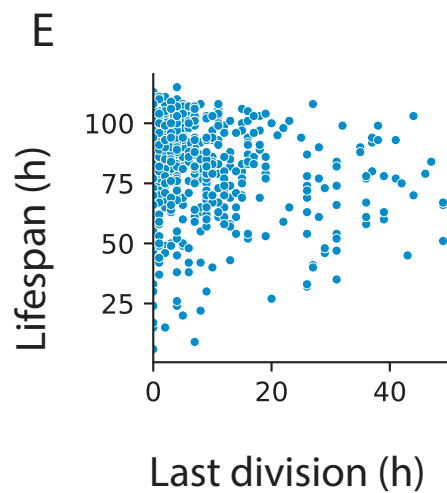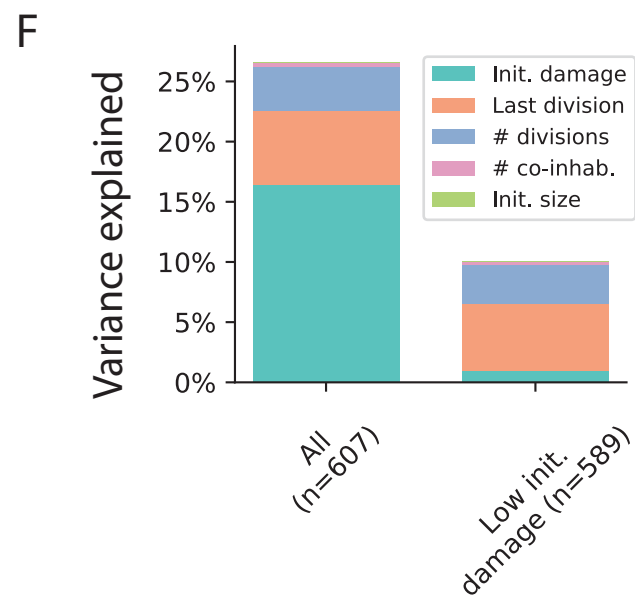

**A**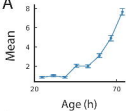**B**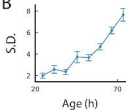**C**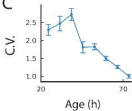**G**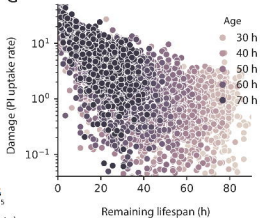**D**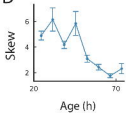**E**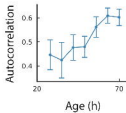**F**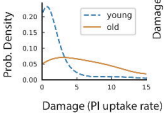



A

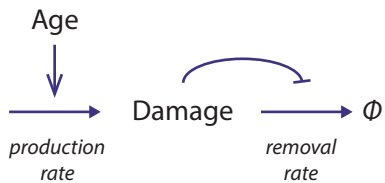

B

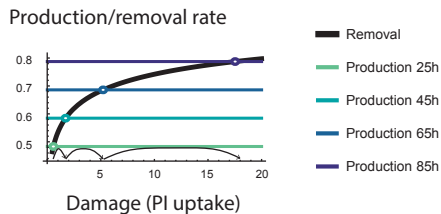

C

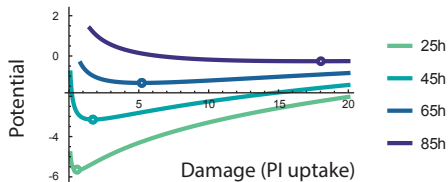

D

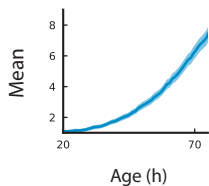

E

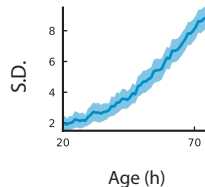

F

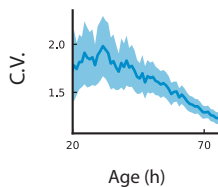

G

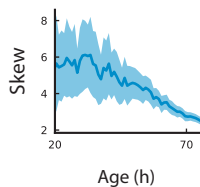

H

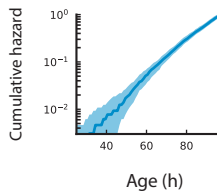

I

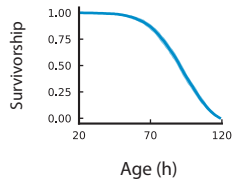

Source: https://www.biorxiv.org/content/10.1101/2022.10.17.512406v1.full.pdf
